# Supplementary material for: A method for dynamic system characterization using hydraulic series resistance
Source: Royal Society of Chemistry journal article supplement (doi:10.1039/b517054k), 2006-01-01
Supplement: b517054k.pdf [file b517054k.pdf]

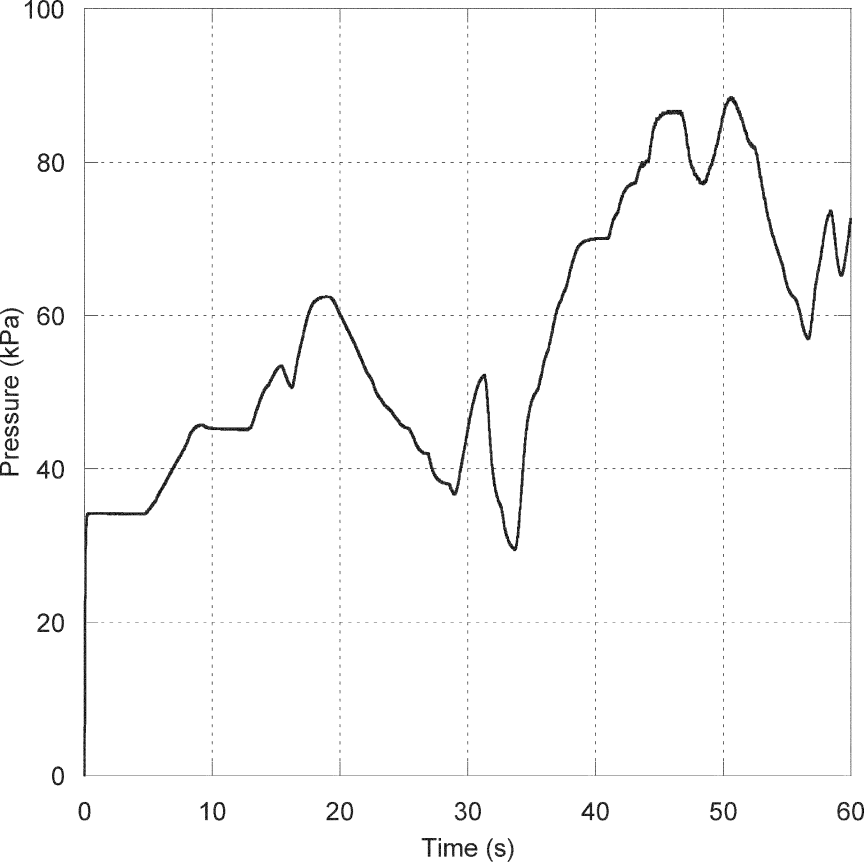

Fig. S1 Arbitrary, time-dependent pressure waveform used to validate flow rate measurement technique.
